# Supplementary material for: Diminished prefrontal cortex activation in patients with binge eating disorder associates with trait impulsivity and improves after impulsivity-focused treatment based on a randomized controlled IMPULS trial
Source: PubMed Central journal article supplement — Neuroimage Clin. 2021 Apr 19;30:102679. doi: 10.1016/j.nicl.2021.102679 (PMC8102655; doi:10.1016/j.nicl.2021.102679), 2021-04-19
Supplement: mmc1.pdf [file mmc1.pdf]

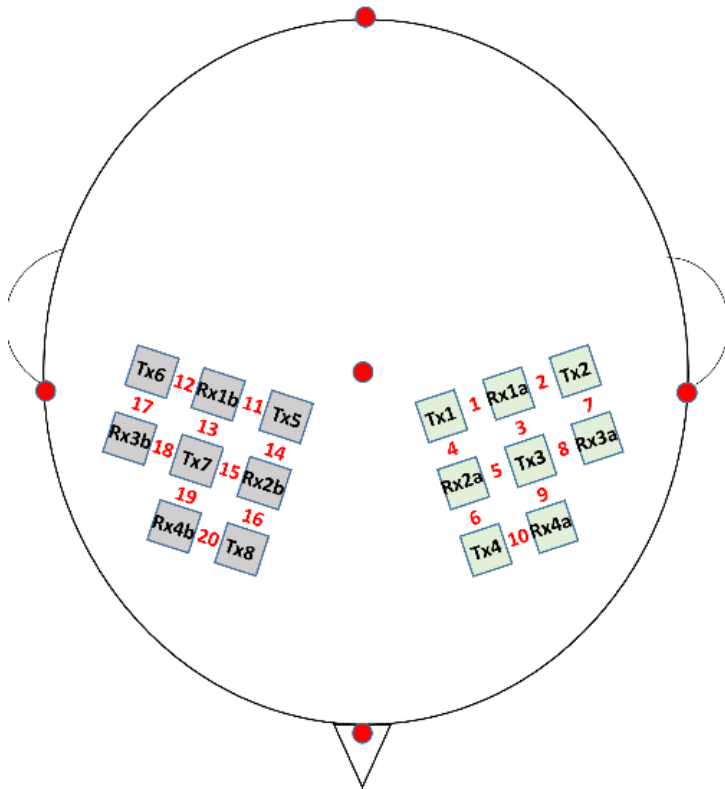

**Supplementary Figure 1.** Probe set arrangement of 20 channel fNIRS system: The red dots represent the reference points (nasion, Cz, inion and preauricular points) according to the 10-20 EEG system. Rx means receiver, Tx means transmitter. The red numbers indicate the measurement channel numbers. Tx3 refers to F3 (left hemisphere) and Tx7 refers to F4 (right hemisphere) of the EEG nomenclature.
