# Supplementary material for: Diminished prefrontal cortex activation in patients with binge eating disorder associates with trait impulsivity and improves after impulsivity-focused treatment based on a randomized controlled IMPULS trial
Source: PubMed Central journal article supplement — Neuroimage Clin. 2021 Apr 19;30:102679. doi: 10.1016/j.nicl.2021.102679 (PMC8102655; doi:10.1016/j.nicl.2021.102679), 2021-04-19
Supplement: mmc2.pdf [file mmc2.pdf]

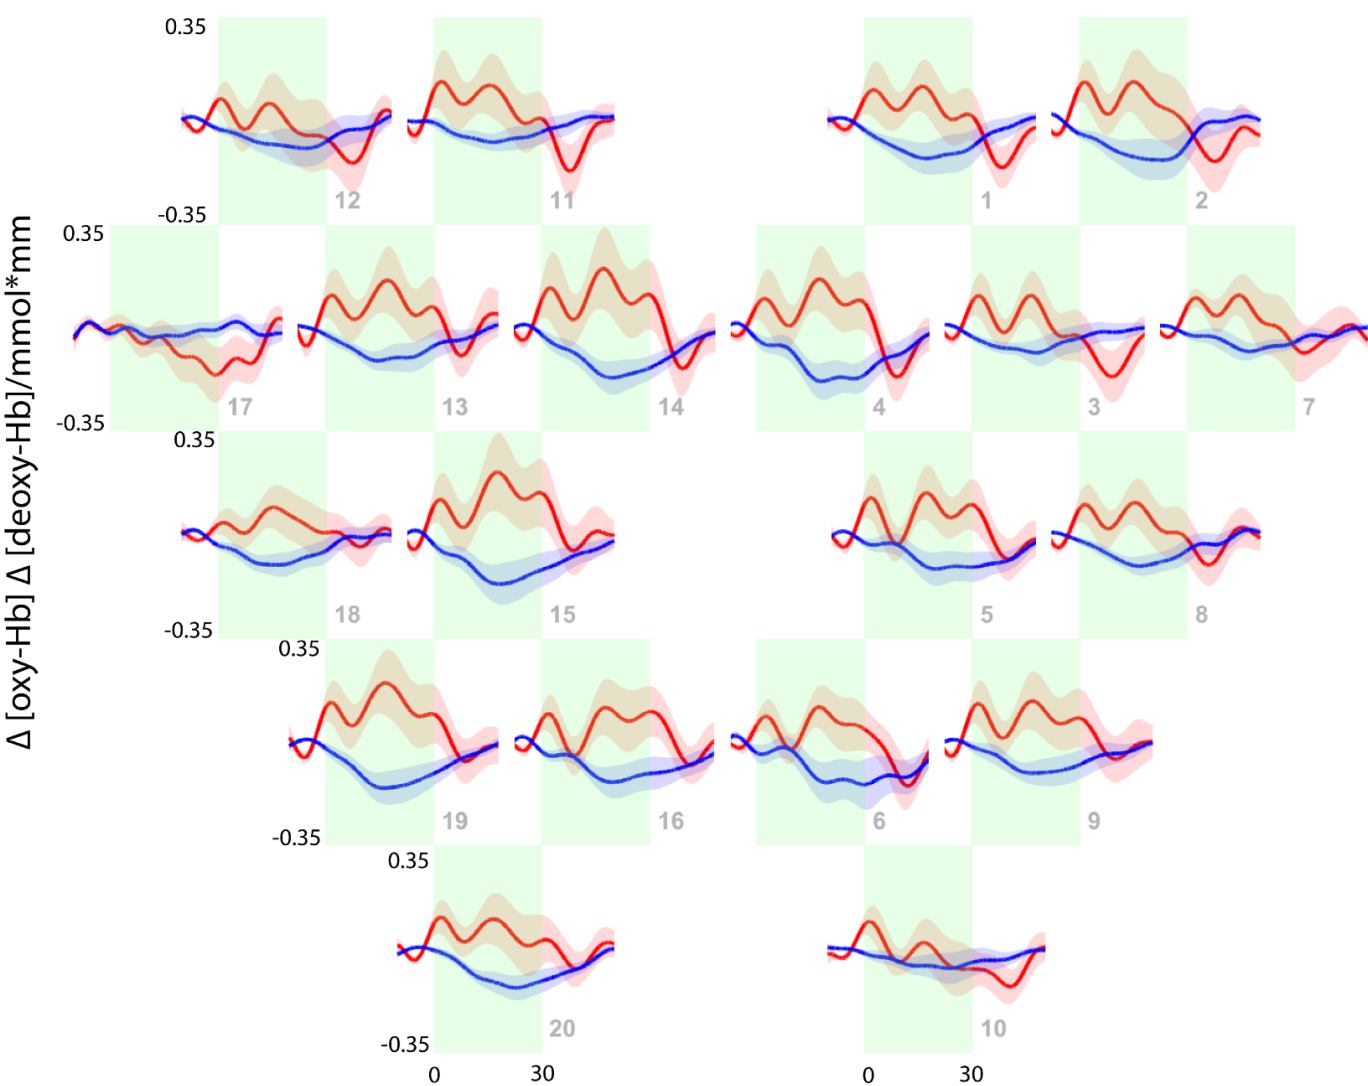

Supplementary figure 2. Event related average responses ( $\pm$  SE) to nogo stimuli in the unhealthy condition displayed over control subjects for bandpass-filtered oxy-Hb (red) and deoxy-Hb (blue). The channel number is depicted on the lower right corner of each channel. The 30 s block length is tagged in light green.
